# Supplementary material for: Highly diastereoselective additions of methoxyallene and acetylenes to chiral α-keto amides
Source: Royal Society of Chemistry journal article supplement (doi:10.1039/b100355k), 2001-01-01
Supplement: b100355k.doc [file b100355k.doc]

**Supplementary** **data**

**Highly diastereoselective additions of methoxyallene and acetylenes to chiral -keto amides**

# So Won Youn, Yong Hae Kim*, Jeong-Wook Hwang, and Youngkyu Do*

*Center for Molecular Design & Synthesis, Department of Chemistry, Korea Advanced Institute of Science and Technology, Taejon, 305-701, Korea. E-mail: kimyh@mail.kaist.ac.kr*

**4b**: Methoxyallene (34.5 mg, 0.392 mmol) was dissolved in dry THF (2 ml) and treated with n-BuLi (197 l, 0.314 mmol) at –78 oC. After 30 min, **1b** (38.9 mg, 0.157 mmol) dissolved in THF (1 ml) was added dropwise to the mixture. After 10 min, the mixture was quenched with distilled water and extracted with CH2Cl2, dried over MgSO4, and concentrated under reduced pressure. The residue was purified by silica gel by eluting EA-hexane (1:4) (27.0 mg, 54%). *δ*H(CDCl3, 400 MHz) 0.85 (t, 3H, *J* =7.4 Hz), 1.94 (m, 2H), 2.88 (d, 1H, *J* =15.6 Hz), 3.20 (m, 3H), 3.29 (s, 3H, major diastereomer (3.32 ppm : minor diastereomer)), 3.44 (s, 3H, major diastereomer (3.43 ppm : minor diastereomer)), 4.97 (m, 1H), 5.03 (s, 1H), 5.68 (dd, 2H, *J* =8.4, 15.0 Hz), 7.13 (m, 3H), 8.08 (d, 1H, *J* =8.1 Hz). *δ*C(CDCl3, 100 MHz) 7.54, 29.98, 32.55, 56.35, 59.04, 59.25, 72.91, 77.90, 93.75, 119.11, 124.72, 124.98, 127.25, 130.72, 136.01, 142.87, 170.73, 197.74. *ν*max(NaCl)/cm−1 3391, 1956, 1644.

**5g**: Trimethylsilylacetylene (18 l, 0.128 mmol) was dissolved in dry THF (1 ml) and treated with n-BuLi (45 l, 0.113 mmol) at 0 oC, followed by cooling to –78 oC after 30 min. The **1a** (17.6 mg, 0.0755 mmol) dissolved in THF (1 ml) was added dropwise to the mixture. After 10 min, the mixture was quenched with brine and extracted with CH2Cl2, dried over MgSO4, and concentrated under reduced pressure. The residue was purified by silica gel by eluting EA-hexane (1:5) (12.9 mg, 66%). *δ*H(CDCl3, 300 MHz) 1.76 (s, 3H), 2.64 (s, 1H), 2.82 (d, 1H, *J* =15.7 Hz), 3.30 (m, 2H), 3.32 (s, 3H), 3.62 (m, 1H), 5.36 (s, 1H), 5.42 (m, 1H), 7.15 (m, 3H), 8.04 (d, 1H, *J* =7.9 Hz). *δ*C(CDCl3, 75 MHz) 29.65, 31.96, 59.14, 59.62, 68.54, 73.30, 73.94, 84.43, 119.21, 125.00, 125.06, 127.48, 131.04, 142.40, 168.68. *ν*max(NaCl)/cm−1 3332, 3282, 2115, 1646. HREIMS *m/z* 259.1208 (M)+, calcd for C15H17NO3 259.1208.

**6b**: To a solution of *t*-BuOK (13.3 mg, 0.113 mmol) in DMSO (2 ml) at 50 oC was added dropwise a solution of the crude **4b** adduct (0.225 mmol) in DMSO (1 ml). After 1 h, the mixture was cooled to rt and quenched with H2O. The mixture was extracted with Et2O, dried over MgSO4, and concentrated under reduced pressure. The residue was purified by silica gel by eluting EA-hexane (1:4) (29.1 mg, overall yield 41%). *δ*H(CDCl3, 400 MHz) 0.93 (t, 3H, *J* =7.4 Hz), 2.12 (m, 2H), 2.99 (d, 1H, *J* =15.6 Hz), 3.13 (m, 2H), 3.31 (s, 3H, major diastereomer (3.35 ppm : minor diastereomer)), 3.64 (s, 3H, major diastereomer (3.68 ppm : minor diastereomer)), 3.74 (m, 1H), 4.72 (m, 2H), 4.76 (m, 2H), 7.09 (m, 3H), 8.06 (d, 1H, *J* =8.0 Hz). *δ*C(CDCl3, 100 MHz) 7.44, 29.70, 32.72, 58.09, 58.47, 59.06, 72.30, 74.23, 90.80, 91.03, 119.07, 124.16, 124.82, 126.94, 130.82, 143.69, 156.63, 169.64. *ν*max(NaCl)/cm−1 1661. HREIMS *m/z* 317.1633 (M)+, calcd for C18H23NO4 317.1627.

**7b**: The **6b** (26.7 mg, 0.0842 mmol) in 1,4-dioxane (0.5 ml) was treated with 5% HCl at rt. After 1 h, the aqueous solution was extracted with ether adjusted to pH 11 with K2CO3, and extracted with EtOAc. The combined organic layer was dried over MgSO4, and concentrated under reduced pressure. The residue was purified by silica gel by eluting EA-hexane (1:2) (19.3 mg, 76%). *δ*H(CDCl3, 400 MHz) 0.93 (t, 3H, *J* =7.4 Hz), 2.03 (m, 2H), 2.56 (m, 2H), 2.89 (d, 1H, *J* =15.8 Hz), 3.21 (m, 2H), 3.28 (s, 3H, major diastereomer (3.31 ppm : minor diastereomer)), 3.43 (m, 1H), 4.23 (m, 2H), 5.15 (m, 1H), 7.13 (m, 3H), 8.05 (d, 1H, *J* =8.1 Hz). *δ*C(CDCl3, 100 MHz) 7.86, 29.65, 32.08, 35.57, 58.54, 59.04, 63.15, 73.29, 87.82, 118.56, 124.59, 125.07, 127.25, 130.96, 143.71, 166.71, 208.55. *ν*max(NaCl)/cm−1 1766, 1643. HREIMS *m/z* 303.1478 (M)+, calcd for C17H21NO4 303.1471.
